# Supplementary material for: The Opposing Contribution of SMS1 and SMS2 to Glioma Progression and Their Value in the Therapeutic Response to 2OHOA
Source: MDPI journal article supplement (doi:10.3390/cancers11010088), 2019-01-14
Supplement: s1 [file s1]

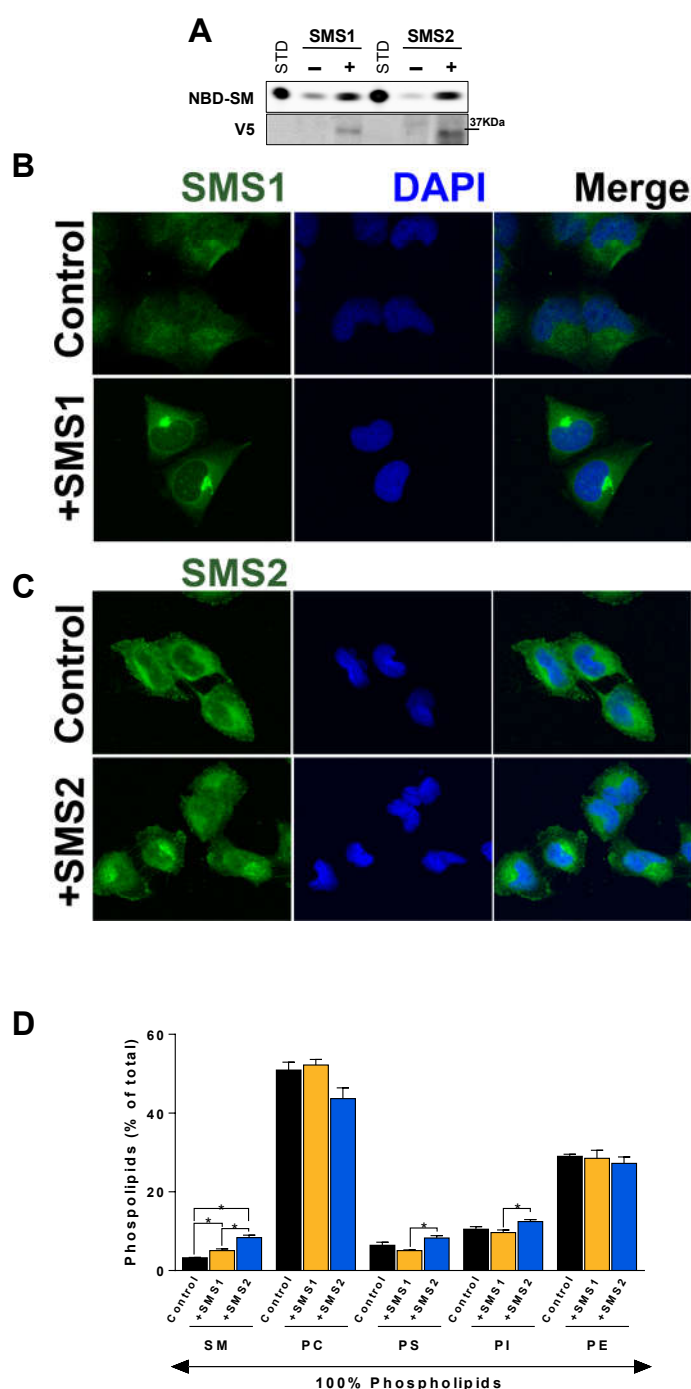

**Figure S3.** Characterization of overexpressed SMS1 and SMS2 proteins. (A) SMS activity assay. Lipids were fractionated by Thin Layer Chromatography (TLC) and newly synthesized NBD-C6-SM was quantified by fluorescence image analysis in control U118 cells (–) or U118 cells overexpressing (+) SMS. Immunofluorescence microscopy images showing the localization and density of endogenous (Control) or overexpressed SMS1 (B) or SMS2 (C) proteins. Images were acquired using same parameters as controls. D: Quantification of the main phospholipid species after SMS1 (yellow) or SMS2 (blue) overexpression (Sphingomyelin (SM), Phosphatidylcholine (PC), Phosphatidylserine (PS), Phosphatidylinositol (PI) and Phosphatidylethanolamine (PE)). Shown are the means  $\pm$  SEM of at least three independent experiments. \*  $p < 0.05$ .

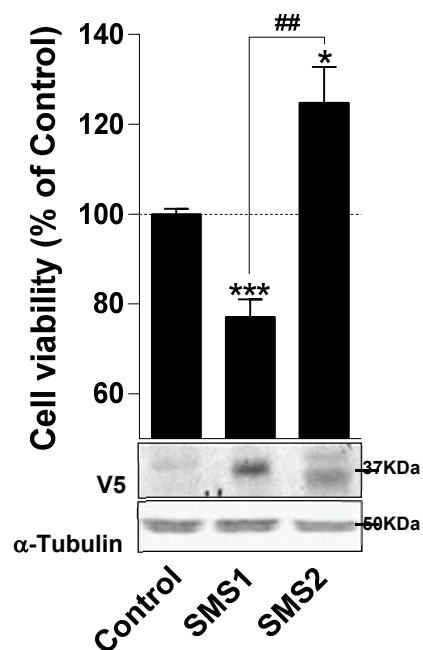

**Figure S4.** Human SF295 GBM cell viability after 48 h of SMS1 or SMS2 overexpression (transient transfection) relative to non-overexpressing control cells. This result confirms that shown in Figure 4A (U118 cells) but in a different cell line. Shown are the means  $\pm$  SEM of at least three independent experiments. \*  $p < 0.05$ , \*\*\*  $p < 0.001$  versus control. ##  $p < 0.01$ .

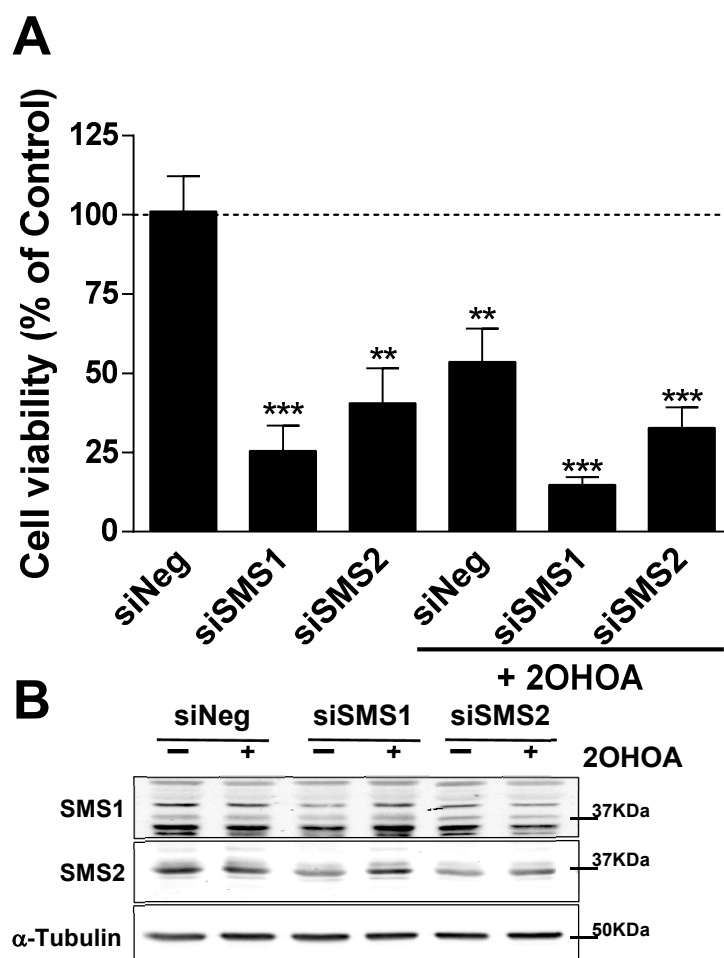

**Figure S5.** (A) Cell viability after incubation with siRNA against SMS1 or SMS2 in presence or absence for 2OHOA (200  $\mu$ M) for 48 h. Negative siRNA was used as control. Shown are the means  $\pm$  SEM of at least three independent experiments. \*  $p < 0.05$ , \*\*  $p < 0.01$ , \*\*\*  $p < 0.001$  versus control. (B) Representative immunoblots showing silencing efficacy.

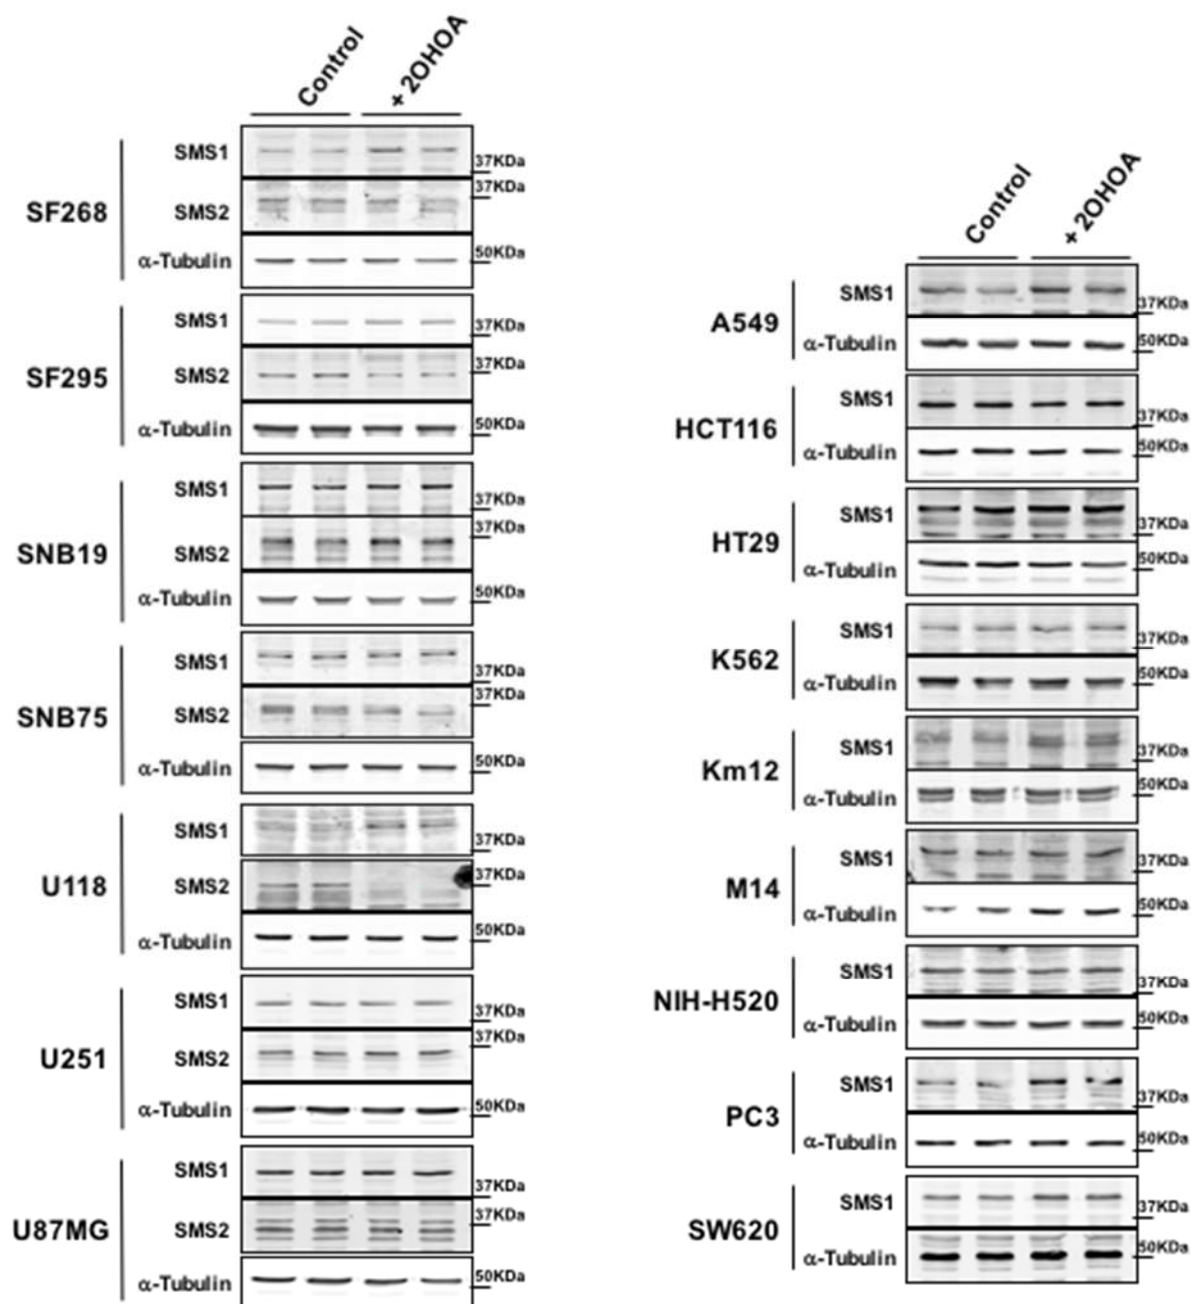

**Figure S6.** Representative immunoblots showing changes in SMS1 or SMS2 protein levels after 48-h treatment with 2OHOA in several cancer cell lines. Blots on the left correspond to human GBM cell lines (SF268, SF295, SNB19, SNB75, U118, U251 and U87MG). Blots on the right correspond to different human cancer cell lines (non-small cells lung cancer: A549 and NIH-H520, colon: HCT116, HT29, KM12 and SW620, leukemia: K562, melanoma: M14 and prostate: PC3).

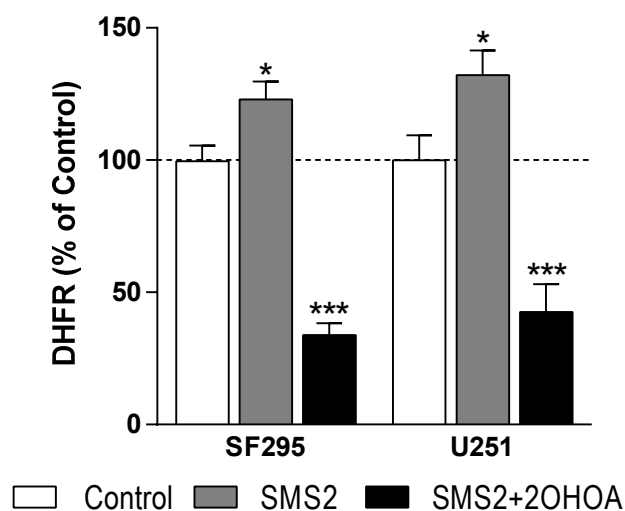

**Figure S7.** DHFR protein levels in SF295 and U251 cells overexpressing SMS2 (48-h transient transfection) in the presence or absence (Control) of 200  $\mu$ M 2OHOA. Shown are the means  $\pm$  SEM of at least three independent experiments. \*  $p < 0.05$ , \*\*\*  $p < 0.001$  versus control.

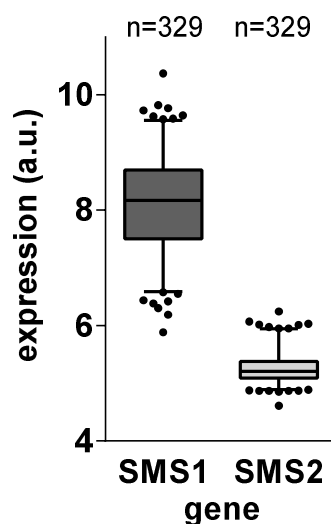

**Figure S8.** SMS1 and SMS2 gene expression in GBM patient samples (data from the REMBRANDT database; a.u.: arbitrary units).

**Table S1.** IC<sub>50</sub> values of different cancer cell lines after a 72 h exposure to 2OHOA.

| Cell line | IC <sub>50</sub> ( $\mu$ M) | Tumour   | Cell line | IC <sub>50</sub> ( $\mu$ M) | Tumour   |
|-----------|-----------------------------|----------|-----------|-----------------------------|----------|
| Km12      | 89.13                       | Colon    | SF295     | 300                         | GBM      |
| A549      | 90.82                       | Lung     | NCIH520   | 342.97                      | Lung     |
| U118      | 200                         | GBM      | M14       | 348.8                       | Melanoma |
| PC3       | 203.74                      | Prostate | HCT116    | 418.47                      | Colon    |
| K562      | 208.59                      | Leukemia | U87MG     | 420                         | GBM      |
| SF268     | 240                         | GBM      | SNB19     | >600                        | GBM      |
| HT29      | 271.1                       | Colon    | SNB75     | >600                        | GBM      |
| SW620     | 284.13                      | Colon    |           |                             |          |

**Table S2.** Changes in SMS1-to-SMS2 protein ratio in response to 2OHOA treatment and IC<sub>50</sub> for 2OHOA in several human GBM cell lines (data from Figure 3B).

| Cell line | SMS1/SMS2 ± S.E.M. | IC <sub>50</sub> (μM) |
|-----------|--------------------|-----------------------|
| U118      | 1.642 ±0.13        | 200                   |
| SF268     | 1.625 ±0.13        | 240                   |
| SF295     | 1.757 ±0.28        | 300                   |
| U251      | 1.180 ±0.06        | 426.5                 |
| SNB19     | 0.715 ±0.08        | >600                  |
| SNB75     | 1.046 ±0.09        | >600                  |

**Table S3.** Basal mRNA levels (arbitrary units, a.u.) in several GBM cell lines and non-tumor (MRC5) cells.

| Cell line | Basal mRNA<br>(a.u.) |
|-----------|----------------------|
| U118      | 0.24                 |
| SF268     | 0.44                 |
| SF295     | 0.87                 |
| U251      | 1.20                 |
| SNB19     | 1.88                 |
| SNB75     | 2.01                 |
| U87-MG    | 4.45                 |
| MRC-5     | 7.58                 |
